# Supplementary material for: MiR-200c/FUT4 axis prevents the proliferation of colon cancer cells by downregulating the Wnt/β-catenin pathway
Source: Research Square preprint supplement (doi:10.21203/rs.3.rs-26901/v5), 2020-12-03

Original gels and blots of Ki-67, FUT4, β-catenin, Cyclin D1, p-GSK-3β, GSK-3β and β-actin in Lovo cells (Corresponding to Fig. 6A in the manuscript).


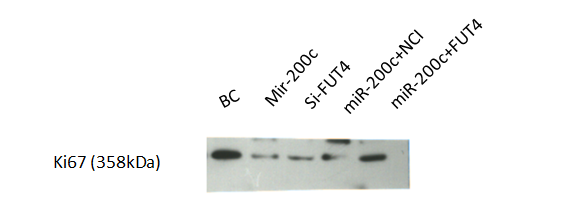

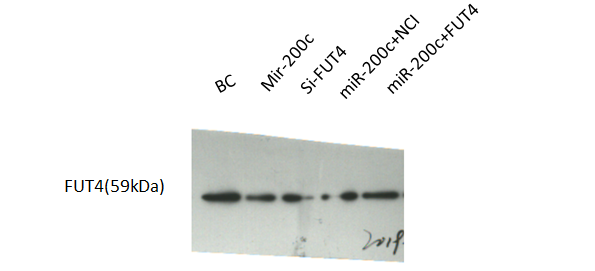

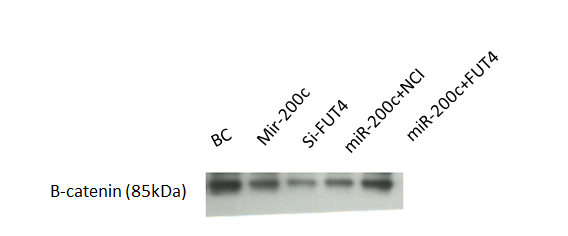

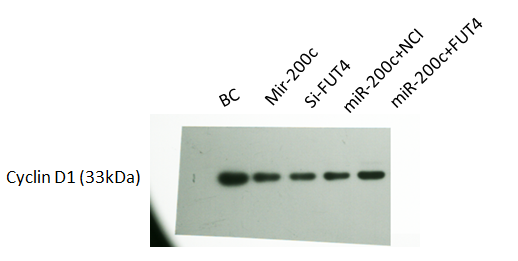

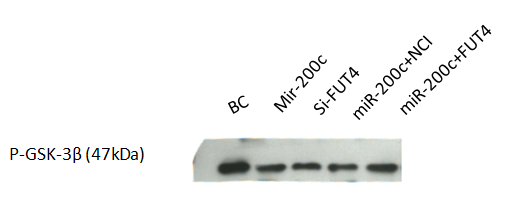

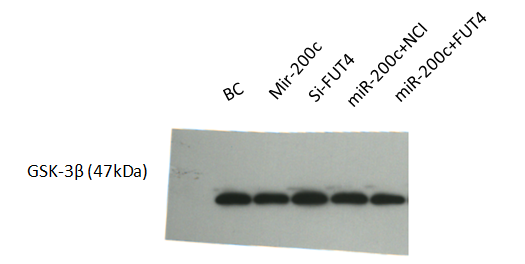


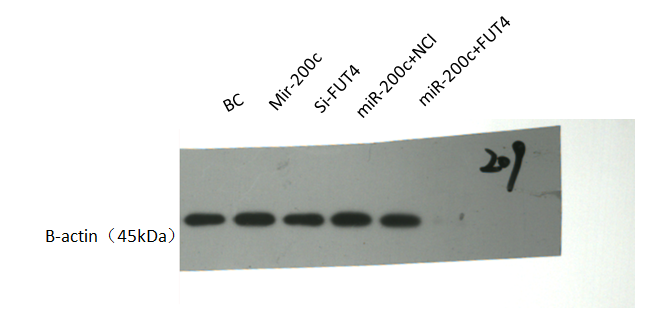


Original gels and blots of Ki-67, FUT4, β-catenin, Cyclin D1, p-GSK-3β, GSK-3βand β-actin in SW480 cells (Corresponding to Fig. 6B in the manuscript).
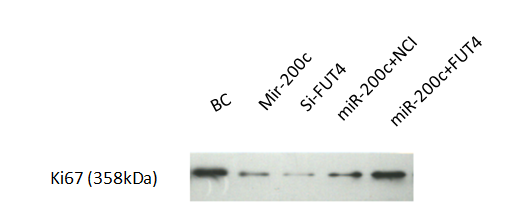

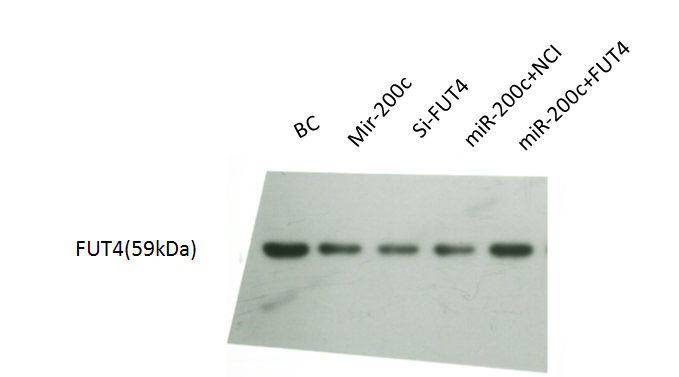

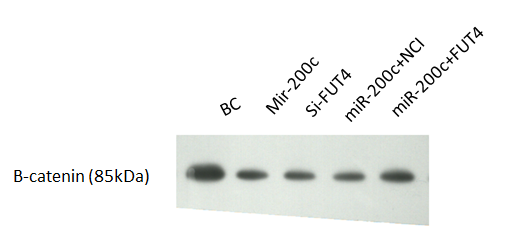


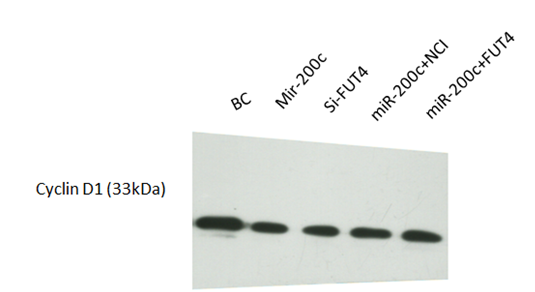

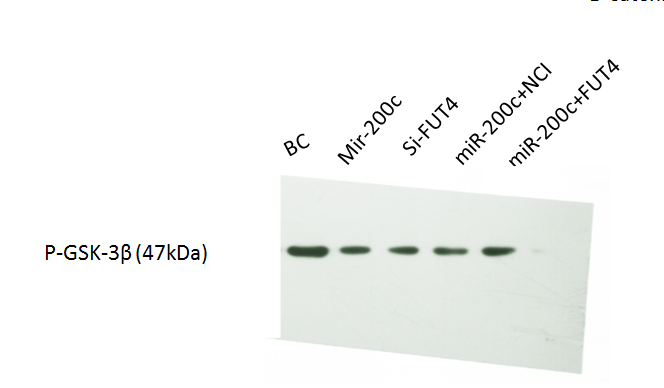


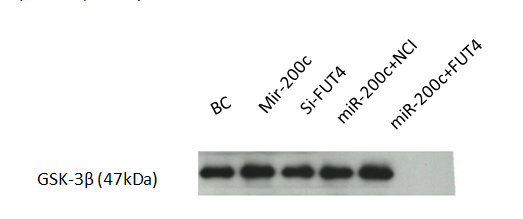


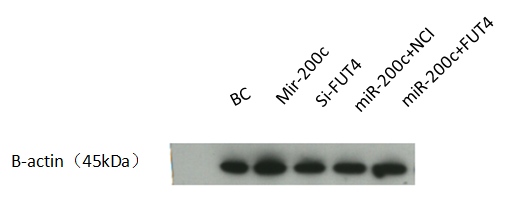

Supplement: Supplementary file 1 [file f60a068a8deca1f0967f125a.docx]
